# Supplementary material for: Sequence–structure relationships in RNA loops: establishing the basis for loop homology modeling
Source: PubMed Central journal article supplement — Nucleic Acids Res. 2009 Nov 18;38(3):970–80. doi: 10.1093/nar/gkp1010 (PMC2817452; doi:10.1093/nar/gkp1010), 2009-11-18
Supplement: gkp1010_1.pdf [file gkp1010_1.pdf]

# Modeling RNA loops based on sequence homology and geometric constraints

## Supplementary Material

Christian Schudoma<sup>a,b,\*</sup>, Patrick May<sup>a,\*</sup>,  
Viktoria Nikiforova<sup>b</sup>, and Dirk Walther<sup>a,\*</sup>

<sup>a</sup>*Bioinformatics Group and*

<sup>b</sup>*System Integration Group, Max Planck Institute of Molecular Plant Physiology, Am Mühlenberg  
1, 14476 Potsdam-Golm, Germany*

---

### Abstract

*Key words:* RNA 3D structure, structure prediction, molecular modeling

---

### RLML – The RLoOM Modeling Language

Modeling loops using the RLoOM application is performed using a simple XML-like script language – RLML. Three parameters can be adjusted: the template data set that should be used, the maximum distance between the anchors of a loop and a target structure such that the inserted loop gives a valid model, and the threshold distance defining when a clash occurs between the new loop and the target molecule.

A single command is enclosed between tags specifying the loop-type of the query.

`<x>...</x>`, with `x = hairpin|segment|internal|multiloop`

Each command has a number of anchors (hairpins/segments:2, internal loops:4, multiloop:6+):

`<anchor>ANCHOR_ID</anchor>`,

with `ANCHOR_ID = RI:C`, `R=resSeq`, `I=iCode`, `C=chainID`

---

\* Corresponding author.

*Email address:* `schudoma@mpimp-golm.mpg.de` (Christian Schudoma).  
*Preprint submitted to Nucleic Acids Research*

The anchor-tag has an optional parameter id, which can be used for specifying the sequence of the anchors. By default, <anchor>-tags are processed in order of appearance.

Finally, each command requires a query:

<query>SEQUENCE</query> ,

with SEQUENCE being a nucleotide sequence, wildcards are allowed

The <query>-tag has three optional parameters: k, force, and mcsearch. The parameter k specifies the tolerated number of mismatches, force denotes whether suitable candidate loops with a different sequence than the query shall be artificially mutated to match the query sequence. The parameter mcsearch, if set to true, allows a valid MC-Search script (for details see e.g. <http://major.irc.ca>) to be submitted instead of the query sequence. By default, k is set to 0, force to false, and mcsearch to true.

The optional <remodel>- tag specifies, whether loop candidates should be mutated into its enclosed sequence.

<remodel>SEQUENCE</remodel> ,

where SEQUENCE has to be a non-wildcard nucleotide sequence.

## Supplementary Figures and Tables

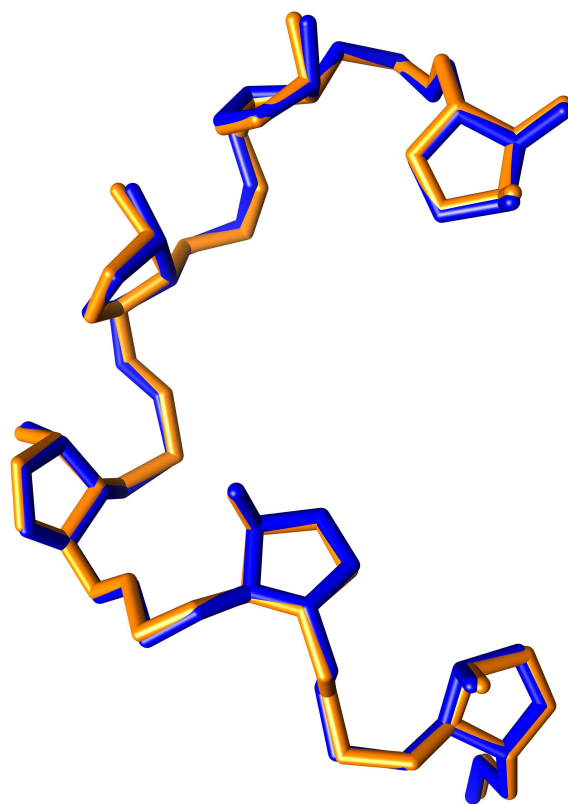

Figure 1. **Structural similarity of highly divergent sequences**

blue: 23S rRNA GNRA-tetraloop hairpin (Sequence: GGGA, PDB id: 1FFK), orange: 23S rRNA tetraloop hairpin (Sequence: AAUC, PDB id: 2GYA) The reduced backbone RMSD of the superposed structures is 0.14Å.

|                         | 1EVV:A       | 1EVV:B       | 13VV:C       | 1L2X        | 1Q8N         | 1Q9A          | 1RMN         | 2CKY         | 2F88         |
|-------------------------|--------------|--------------|--------------|-------------|--------------|---------------|--------------|--------------|--------------|
| <b>Bases</b>            | <b>13-22</b> | <b>30-40</b> | <b>53-61</b> | <b>7-14</b> | <b>14-19</b> | <b>6-22</b>   | <b>16-21</b> | <b>26-36</b> | <b>23-27</b> |
| <b>Best Hits</b>        |              |              |              |             |              |               |              |              |              |
| <b>RLoOM</b>            | 1EHZ*        | 1MJ1         | 2K4C*        | 1L3D*       | 1M90*        | 2D3O*         | 3BBN*        | 3D2X*        | 1JZX*        |
| <b>RMSD<sub>a</sub></b> | 0.14         | 0.00         | 0.15         | 0.90        | 0.48         | 0.16          | 0.20         | 0.25         | 0.44         |
| <b>RMSD<sub>b</sub></b> | 1.04         | 0.78         | 1.11         | 1.72        | 4.12         | 2.76          | 3.12         | 0.53         | 1.58         |
| <b>RMSD<sub>s</sub></b> | 0.98         | 0.69         | 0.90         | 0.75        | 2.05         | 1.05          | 1.71         | 0.38         | 1.34         |
| <b>iFoldRNA</b>         |              |              |              |             |              |               |              |              |              |
| <b>RMSD<sub>a</sub></b> | 1.08         | 0.30         | 1.21         | 0.50        | 0.48         | 2.58          | 0.60         | 1.39         | 1.01         |
| <b>RMSD<sub>b</sub></b> | 10.88        | 3.90         | 4.72         | 4.40        | 1.26         | 23.19         | 2.51         | 9.21         | 1.45         |
| <b>RMSD<sub>s</sub></b> | 6.19         | 6.42         | 6.90         | 5.43        | 5.31         | 8.75          | 5.68         | 6.31         | 1.18         |
| <b>All Hits</b>         |              |              |              |             |              |               |              |              |              |
| <b>RLoOM</b>            |              |              |              |             |              |               |              |              |              |
| #models                 | 14           | 11           | 16           | 3           | 25           | 23            | 58           | 2            | 13           |
| <b>RMSD<sub>a</sub></b> |              |              |              |             |              |               |              |              |              |
| Range                   | [0.00,0.96]  | [0.00,0.52]  | [0.00,0.95]  | [0.11,0.99] | [0.00,1.02]  | [0.03,1.13]   | [0.00,1.23]  | [0.22,0.25]  | [0.00,2.63]  |
| Mean                    | 0.48 ± 0.27  | 0.29 ± 0.17  | 0.48 ± 0.25  | 0.67 ± 0.48 | 0.70 ± 0.20  | 0.44 ± 0.28   | 0.52 ± 0.23  | 0.24 ± 0.02  | 1.16 ± 0.80  |
| Median                  | 0.52         | 0.31         | 0.50         | 0.90        | 0.70         | 0.33          | 0.47         | 0.24         | 0.97         |
| <b>RMSD<sub>b</sub></b> |              |              |              |             |              |               |              |              |              |
| Range                   | [0.00,2.98]  | [0.78, 1.74] | [0.00,3.81]  | [0.25,2.19] | [0.00,2.31]  | [0.15,8.66]   | [0.00,1.26]  | [0.41,0.53]  | [0.00,3.51]  |
| Mean                    | 2.73 ± 2.20  | 1.10 ± 0.45  | 1.93 ± 1.27  | 1.39 ± 1.01 | 1.69 ± 0.86  | 4.35 ± 2.09   | 1.18 ± 0.35  | 0.47 ± 0.08  | 2.30 ± 0.97  |
| Median                  | 2.26         | 1.15         | 1.70         | 1.72        | 1.52         | 3.99          | 1.10         | 0.47         | 2.19         |
| <b>RMSD<sub>s</sub></b> |              |              |              |             |              |               |              |              |              |
| Range                   | [0.00,2.26]  | [0.69,1.1]   | [0.00,3.15]  | [0.10,0.79] | [0.00,1.67]  | [0.14,2.05]   | [0.00,1.44]  | [0.38,0.49]  | [0.00,2.89]  |
| Mean                    | 1.43 ± 0.82  | 0.73 ± 0.28  | 1.29 ± 0.91  | 0.55 ± 0.39 | 1.24 ± 0.42  | 1.45 ± 0.45   | 1.74 ± 0.73  | 0.44 ± 0.08  | 1.84 ± 0.75  |
| Median                  | 1.43         | 0.72         | 0.93         | 0.75        | 1.20         | 1.40          | 1.54         | 0.44         | 1.76         |
| <b>iFoldRNA</b>         |              |              |              |             |              |               |              |              |              |
| #models                 | 10           | 10           | 10           | 10          | 10           | 10            | 10           | 10           | 10           |
| <b>RMSD<sub>a</sub></b> |              |              |              |             |              |               |              |              |              |
| Range                   | [1.08,4.12]  | [0.30,3.04]  | [1.21,3.51]  | [0.50,1.22] | [0.48,4.78]  | [2.58,3.99]   | [0.60,3.42]  | [1.39,7.28]  | [1.01,5.92]  |
| Mean                    | 2.42 ± 0.92  | 0.85 ± 0.89  | 2.19 ± 0.79  | 0.76 ± 0.24 | 1.36 ± 1.36  | 3.18 ± 0.52   | 1.82 ± 0.89  | 5.04 ± 1.82  | 2.91 ± 1.46  |
| Median                  | 2.48         | 0.48         | 2.15         | 0.76        | 0.76         | 3.01          | 1.97         | 5.24         | 2.93         |
| <b>RMSD<sub>b</sub></b> |              |              |              |             |              |               |              |              |              |
| Range                   | [9.60,21.67] | [2.44,16.45] | [4.56,17.46] | [3.18,7.55] | [1.26,10.98] | [19.05,28.28] | [2.34,9.69]  | [9.21,18.62] | [1.45,5.75]  |
| Mean                    | 14.68 ± 4.24 | 8.18 ± 5.40  | 10.02 ± 5.08 | 4.94 ± 1.34 | 3.48 ± 2.83  | 24.11 ± 2.86  | 4.10 ± 2.23  | 13.57 ± 2.91 | 3.41 ± 1.39  |
| Median                  | 14.51        | 6.82         | 9.39         | 4.65        | 2.45         | 23.95         | 3.08         | 13.37        | 3.27         |
| <b>RMSD<sub>s</sub></b> |              |              |              |             |              |               |              |              |              |
| Range                   | [4.77,6.83]  | [6.37,9.77]  | [5.53,7.83]  | [4.94,5.89] | [5.31,6.25]  | [7.61,9.50]   | [5.04,8.46]  | [6.31,8.86]  | [1.18,4.35]  |
| Mean                    | 6.10 ± 0.65  | 7.23 ± 1.26  | 6.61 ± 0.63  | 5.30 ± 0.29 | 5.72 ± 0.33  | 8.55 ± 0.53   | 6.09 ± 1.03  | 7.55 ± 0.84  | 2.48 ± 0.91  |
| Median                  | 6.26         | 6.59         | 6.50         | 5.33        | 5.68         | 8.62          | 5.80         | 7.42         | 2.34         |

Table 1

Loop modeling results Modeled structures are indicated by their PDB-identifier and are located in chain A.  $RMSD_a$ : RMSD between anchors,  $RMSD_b$ : RMSD between reduced backbones given anchor superposition,  $RMSD_s$ : structural similarity – RMSD between reduced backbones given optimal superposition, values are given in Å, \*: second best template (cf. text)

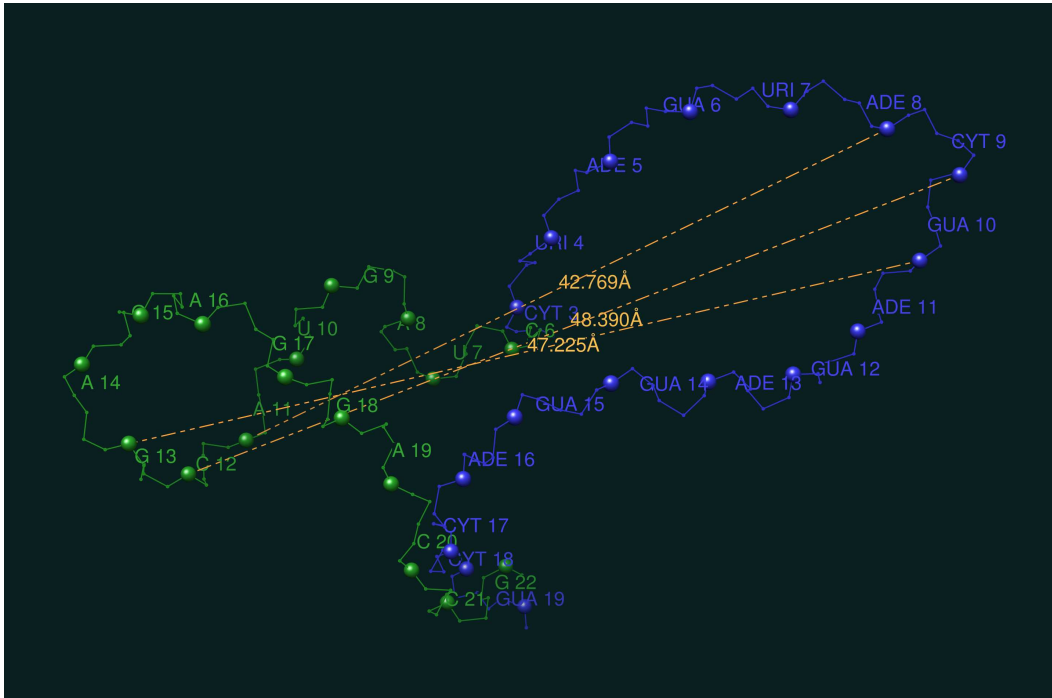

Figure 2. **Backbone divergence between iFoldRNA model and native structure**

blue: iFoldRNA model green: PDB structure 1q9a, A6-A22. Structures are superposed at their anchors.
